# Supplementary material for: Steroid-Resistant Nephrotic Syndrome due to NPHS2 Variants Is Not Associated With Posttransplant Recurrence
Source: PubMed Central journal article supplement — Kidney Int Rep. 2024 Jan 10;9(4):973–81. doi: 10.1016/j.ekir.2024.01.005 (PMC11101709; doi:10.1016/j.ekir.2024.01.005), 2024-01-10
Supplement: mmc1.pdf [file mmc1.pdf]

## Table S1 – List of genes

List of 228 genes from our panel of known genes involved in kidney diseases. Genes involved in FSGS are underlined in bold.

ACE (NM\_000789) - ACTA2 (NM\_001613) – ACTG2 (NM\_001615) - **ACTN4 (NM\_004924)** - AGT (NM\_000029) - AGTR1 (NM\_031850) - AHI1 (NM\_017651) - **ALG1 (NM\_019109.4)** – ALG9 (NM\_024740) - ALMS1 (NM\_015120) – **ANKFY1 (NM\_01257999)** - ANKS3 (NM\_133450) - ANKS6 (NM\_173551) - **ANLN (NM\_018685)** - ANOS1 (KAL1) (NM\_000216) - **APOL1 (Allèles G1-G2 - Genovese et al., Science 2010)** - **ARHGDI1 (NM\_004309)** - ARL13B (NM\_182896) - ARL6 (NM\_177976) - **AVIL (NM\_006576)** – B9D1 (NM\_015681) - B9D2 (NM\_030578) - BBIP1 (NM\_001195306) - BBS1 (NM\_024649) - BBS10 (NM\_024685) - BBS12 (NM\_152618) - BBS2 (NM\_031885) - BBS4 (NM\_033028) - BBS5 (NM\_152384) - BBS7 (NM\_176824) – BBS9 (NM\_198428) - BICC1 (NM\_001080512) - BMP4 (NM\_001202) – BNC2 (NM\_017637) - C2CD3 (NM\_015531) - CC2D2A (NM\_001080522) - **CD2AP (NM\_012120)** - CDC5L (NM\_001253) - CEP164 (NM\_014956) - CEP19 (NM\_032898) – CEP290 (NM\_025114) - CEP41 (NM\_018718) - CEP83 (CCDC41) (NM\_016122) - CHD1L (NM\_004284) - CHD7 (NM\_017780) - CHRM3 (NM\_000740) - **CLCN5 (NM\_001127898; canonique NM\_000084)** - **COL4A3 (NM\_000091)** - **COL4A4 (NM\_000092)** - **COL4A5 (NM\_000495)** - COL4A6 (NM\_001847) - **COQ2 (NM\_015697)** - **COQ6 (NM\_182476)** - **COQ8B (ADCK4) (NM\_024876.3)** - CLPANE1 (C5orf42) (NM\_023073) - **CRB2 (NM\_173689)** - CSPP1 (NM\_024790) - CTNS (NM\_004937) - **CUBN (NM\_001081)** - DCDC2 (NM\_016356) – DDX59 (NM\_001031725) - **DGKE (NM\_003647)** - DHCR7 (NM\_001360) - DIS3L2 (NM\_152383) - DNAJB11 (NM\_016306) - DSTYK (NM\_015375) - DYNC2H1 (NM\_001080463) – DYRK1A (NM\_001396) - DZIP1L (NM\_173543) - **EMP2 (NM\_001424)** – ESRRG (NM\_001243518) - EVC (NM\_153717) - EVC2 (NM\_147127) - EXOC4 (NM\_021807) - EYA1 (NM\_172060) - FAM58A (NM\_152274) - FAN1 (NM\_014967) - **FAT1 (NM\_005245)** - FAT4 (NM\_024582) - FGF20 (NM\_019851) – FOXF1 (NM\_001451) - FOXP1 (NM\_032682) - FRAS1 (NM\_025074) - FREM1 (NM\_144966) - FREM2 (NM\_207361) - GANAB (NM\_198335) - **GAPVD1 (NM\_1282679)** - GATA3 (NM\_001002295) - GDF6 (NM\_001001557) - GDNF (NM\_000514) – GLA (NM\_000169) - GLI3 (NM\_000168) - GLIS2 (NM\_032575) - GON7 (C14orf142) (NM\_032490) - GPC3 (NM\_004484) - GREB1L (NM\_001142966) - GREM1 (NM\_013372) - GRHL2 (NM\_024915) - GRIP1 (NM\_021150) - HNF1B (NM\_000458) - HPSE2 (NM\_021828) - HYLS1 (NM\_145014) - IFT122 (NM\_052985) - IFT140 (NM\_014714) - IFT172 (NM\_015662) - IFT27 (NM\_006860) - IFT43 (NM\_052873) - IFT80 (NM\_020800) - IFT81 (NM\_014055) - **INF2 (NM\_022489)** - INPP5E (NM\_019862) – INVS (NPHP2) (NM\_014425) - IQCB1 (NM\_001023570) - **ITGA3 (NM\_002204)** - ITGA8 (NM\_003638) - JAG1 (NM\_000214) - **KANK2 (NM\_001136191.2)** - **KANK4 (NM\_181712.4)** - KIAA0586 (NM\_001244189) – KIF7 (NM\_198525) - KIF14 (NM\_014875) – **LAGE3 (NM\_006014)** - **LAMA5 (NM\_005560)** - **LAMB2 (NM\_002292)** - LHX1 (NM\_005568) - LIFR (NM\_002310) - **LMX1B (NM\_002316.3)** - LRIG2 (NM\_014813) - LRP4 (NM\_002334) - LZTFL1 (NM\_020347) - **MAGI2 (NM\_012301.3)** – MAPKBP1 (NM\_001128608) - MKKS (NM\_018848) - MKS1 (NM\_017777) - **MTTL1 (NC\_012920.1)** - **MYH9 (NM\_002473)** - MYH11 (NM\_001040114) - **MYO1E (NM\_004998.3)** – MYOCD (NM\_001146312) - NEK1 (NM\_012224) - NEK8 (NM\_178170) – NOTCH2 (XM\_005270902) - NPHP1 (NM\_000272) - NPHP3 (NM\_153240) - NPHP4 (NM\_015102) - **NPHS1 (NM\_004646)** - **NPHS2 (NM\_014625)** - NRIP1 (NM\_003489) - **NUP85 (NM\_024844)** - **NUP93 (NM\_014669)** - **NUP107 (NM\_020401)** – **NUP133 (NM\_018230)** - **NUP160 (NM\_015231)** - **NUP205 (NM\_015135)** - **NXF5 (NM\_003901)** – **OCRL (NM\_000276.3)** - OFD1 (NM\_003611) - OSGEP (NM\_017807) - OSR1 (NM\_145260) - **PAX2 (NM\_003987)** - PBX1 (NM\_002585) – PCARE (C2orf71) (NM\_001029883) - PDE6D (NM\_002601) - **PDSS2 (NM\_020381)** - PKD2 (NM\_000297) - PKHD1 (NM\_138694) - **PLCE1/NPHS3 (NM\_016341)** ;

**NM\_001165979) - PMM2 (NM\_000303) - POC1B (NM\_172240) - PODXL (NM\_005397) - PTPRO (NM\_030667) – REN (NM\_000537) - RET (NM\_020975) - ROBO2 (NM\_002942) - RPGRIP1L (NM\_015272) - SALL1 (NM\_002968) - SALL4 (NM\_020436) - SCLT1 (NM\_144643) - SDCCAG8 (NM\_006642) - SEC61A1 (NM\_013336) - **SGPL1 (NM\_003901)** – SIX1 (NM\_005982) -SIX2 (NM\_016932) - SIX5 (NM\_175875) - SLC41A1 (NM\_173854) - SLIT2 (NM\_004787) – SLIT3 (NM\_003062) - **SMARCAL1 (NM\_014140)** - SOX17 (NM\_022454) - SRGAP1 (NM\_020762) - SRPK1 (NM\_003137) – TBC1D1 (NM\_015173) - **TBC1D8B (NM\_017752)** - TBC1D32 (NM\_152730) - TBX3 (NM\_005596) - TBX18 (NM\_001080508) - TCTN1 (NM\_001082538) - TCTN2 (NM\_024809) - TCTN3 (NM\_015631) - TMEM107 (NM\_032354) - TMEM138 (NM\_016464) - TMEM216 (NM\_001173990) - TMEM231 (NM\_001077416) - TMEM237 (NM\_001044385) - TMEM260 (NM\_017799) - TMEM67 (NM\_153704) - **TPR3RK (NM\_033550)** - **TPRKB (NM\_016058)** - TRAF3IP1 (NM\_015650) - TRAP1 (NM\_016292) - TRIM32 (NM\_012210) - **TRPC6 (NM\_004621)** - **TTC21B (NM\_024753)** - TTC8 (NM\_198309) - UMOD (NM\_003361) - UPK3A (NM\_006953) - WDPCP (NM\_015910) - **WDR4 (NM\_033661)** - WDR19 (NM\_025132) - WDR34 (NM\_052844) - WDR35 (NM\_001006657) – WDR60 (NM\_018051) - **WDR73 (NM\_032856)** - WNT4 (NM\_030761) - **WT1 (NM\_024426.4)** - XPNPEP3 (NM\_022098) - **YRDC (NM\_024640)** - ZNF423 (NM\_015069)**
